# Supplementary material for: On the performance of second-order approximate coupled-cluster singles and doubles methods for non-valence anions
Source: Royal Society of Chemistry journal article supplement (doi:10.1039/d3cp05923e), 2023-12-19
Supplement: d3cp05923e1.pdf [file d3cp05923e1.pdf]

# On the performance of second-order approximate coupled-cluster singles and doubles methods for non-valence anions

## Supplementary Information

Garrette Pauley Paran, Cansu Utku and Thomas-Christian Jagau  
*Department of Chemistry, KU Leuven, Celestijnenlaan 200F, B-3001 Leuven, Belgium*

### 1 Cartesian geometries in Angstrom

#### 1.1 Valence anions

```
$comment
Tetrafluorobenzoquinone
Nuclear Repulsion Energy = 704.26826452 hartrees
$end

$molecule
0 1
F 2.3756498080 -1.3751980891 0.0000000000
F 2.3756498080 1.3751980891 0.0000000000
F -2.3756498080 1.3751980891 0.0000000000
F -2.3756498080 -1.3751980891 -0.0000000000
C 1.2596187001 -0.6724175000 -0.0000000000
C 1.2596187001 0.6724175000 0.0000000000
C -1.2596187001 0.6724175000 -0.0000000000
C -1.2596187001 -0.6724175000 -0.0000000000
C 0.0000000000 1.4497959443 0.0000000000
C -0.0000000000 -1.4497959443 -0.0000000000
O 0.0000000000 2.6684619443 0.0000000000
O -0.0000000000 -2.6684619443 -0.0000000000
$end
```

\$comment  
Benzoquinone  
Nuclear Repulsion Energy = 322.80928840 hartrees  
\$end

\$molecule  
O 1  
H 1.2522467586 2.1752956190 0.0000000000  
H -1.2522467586 2.1752956190 -0.0000000000  
H -1.2522467586 -2.1752956190 0.0000000000  
H 1.2522467586 -2.1752956190 -0.0000000000  
C -0.6722520106 1.2624676881 -0.0000000000  
C 0.6722520106 1.2624676881 0.0000000000  
C -0.6722520106 -1.2624676881 0.0000000000  
C 0.6722520106 -1.2624676881 -0.0000000000  
C -1.4384853819 -0.0000000012 0.0000000000  
C 1.4384853819 0.0000000012 0.0000000000  
O -2.6663113819 0.0000000032 -0.0000000000  
O 2.6663113819 0.0000000000 0.0000000000  
\$end

\$comment  
p-Nitrobenzonitrile  
Nuclear Repulsion Energy = 529.48488835 hartrees  
\$end

\$molecule  
O 1  
N 0.0000000000 0.0000000000 2.4489844499  
O 1.0918208133 -0.0000000000 3.0112781895  
O -1.0918208133 0.0000000000 3.0112781895  
C 0.0000000000 0.0000000000 0.9776524499  
C 1.2185899629 -0.0000000000 0.3108953662  
H 2.1368448435 -0.0000000000 0.8768880604  
C 1.2154656969 -0.0000000000 -1.0772231179  
H 2.1459021497 -0.0000000000 -1.6265378249  
C -1.2185899629 0.0000000000 0.3108953662  
H -2.1368448435 0.0000000000 0.8768880604  
C -1.2154656969 0.0000000000 -1.0772231179  
H -2.1459021497 0.0000000000 -1.6265378249  
C 0.0000000000 0.0000000000 -1.7731871363  
C 0.0000000000 0.0000000000 -3.2030041363  
N 0.0000000000 0.0000000000 -4.3766971363  
\$end

\$comment  
1,4-Naphthoquinone  
Nuclear Repulsion Energy = 623.53248846 hartrees  
\$end

\$molecule  
O 1  
C -0.7013334144 -0.0000000000 -0.2560870783  
C -1.3980277754 -0.0000000000 -1.4658679583  
H -2.4788243060 -0.0000000000 -1.4384597806  
C -0.6990446880 -0.0000000000 -2.6670143525  
H -1.2380846413 -0.0000000000 -3.6043603426  
C 0.6990446880 0.0000000000 -2.6670143525  
H 1.2380846413 0.0000000000 -3.6043603426  
C 1.3980277754 0.0000000000 -1.4658679583  
H 2.4788243060 0.0000000000 -1.4384597806  
C 0.7013334144 0.0000000000 -0.2560870783  
C -1.4570676272 0.0000000000 1.0210353373  
O -2.6837070586 0.0000000000 1.0540261569  
C -0.6725512597 0.0000000000 2.2714989216  
H -1.2456793580 0.0000000000 3.1892137877  
C 0.6725512597 -0.0000000000 2.2714989216  
H 1.2456793580 -0.0000000000 3.1892137877  
C 1.4570676272 -0.0000000000 1.0210353373  
O 2.6837070586 -0.0000000000 1.0540261569  
\$end

\$comment  
Maleic Anhydride  
Nuclear Repulsion Energy = 275.04298010 hartrees  
\$end

\$molecule  
O 1  
O 0.0000000000 0.0000000000 0.9718680070  
C -1.1268660872 -0.0000000000 0.1576890229  
C 1.1268660872 0.0000000000 0.1576890229  
O -2.2395980384 -0.0000000000 0.5973627979  
O 2.2395980384 0.0000000000 0.5973627979  
C -0.6678593576 -0.0000000000 -1.2547634396  
C 0.6678593576 0.0000000000 -1.2547634396  
H -1.3552061648 -0.0000000000 -2.0839290906  
H 1.3552061648 0.0000000000 -2.0839290906  
\$end

\$comment  
Phenazine  
Nuclear Repulsion Energy = 780.72543176 hartrees  
\$end

\$molecule  
O 1  
N 0.0000000000 -1.4328650242 0.0000000000  
C -1.1407560176 -0.7205037326 -0.0000000000  
C 1.1407560176 -0.7205037326 0.0000000000  
C -2.3804840748 -1.4116393984 -0.0000000000  
H -2.3546309664 -2.4927823331 -0.0000000000  
C -3.5592048726 -0.7099210621 -0.0000000000  
H -4.5011369865 -1.2414092426 -0.0000000000  
C 2.3804840748 -1.4116393984 0.0000000000  
H 2.3546309664 -2.4927823331 0.0000000000  
C 3.5592048726 -0.7099210621 0.0000000000  
H 4.5011369865 -1.2414092426 0.0000000000  
C 3.5592048726 0.7099210621 -0.0000000000  
H 4.5011369865 1.2414092426 -0.0000000000  
C 2.3804840748 1.4116393984 -0.0000000000  
H 2.3546309664 2.4927823331 -0.0000000000  
C 1.1407560176 0.7205037326 -0.0000000000  
N -0.0000000029 1.4328650242 -0.0000000000  
C -1.1407560176 0.7205037326 -0.0000000000  
C -2.3804840748 1.4116393984 -0.0000000000  
H -2.3546309664 2.4927823331 -0.0000000000  
C -3.5592048726 0.7099210621 -0.0000000000  
H -4.5011369865 1.2414092426 -0.0000000000  
\$end

\$comment  
Fumaronitrile  
Nuclear Repulsion Energy = 162.78773538 hartrees  
\$end

\$molecule  
O 1  
C 0.4866183375 0.4604063019 -0.0000000000  
C -0.4866183375 -0.4604063019 -0.0000000000  
H 0.2539941120 1.5174807823 0.0000000000  
H -0.2539941120 -1.5174807823 -0.0000000000  
C 1.8636261111 0.1123116934 -0.0000000000  
C -1.8636261111 -0.1123116934 0.0000000000  
N 2.9877495396 -0.1427508309 -0.0000000000  
N -2.9877495396 0.1427508309 0.0000000000  
\$end

\$comment  
Azulene  
Nuclear Repulsion Energy = 454.46094658 hartrees  
\$end

\$molecule  
O 1  
C -0.7487798402 -0.0000000000 0.5511274366  
C -1.5947707452 -0.0000000000 -0.5483651878  
H -2.6563583743 -0.0000000000 -0.3181972367  
C -1.2628648085 -0.0000000000 -1.9039171278  
H -2.1004885786 -0.0000000000 -2.5907702075  
C 0.0000000000 0.0000000000 -2.4969737813  
H 0.0000000000 0.0000000000 -3.5812257813  
C 1.2628648085 0.0000000000 -1.9039171278  
H 2.1004885786 0.0000000000 -2.5907702075  
C 1.5947707452 0.0000000000 -0.5483651878  
H 2.6563583743 0.0000000000 -0.3181972367  
C 0.7487798402 0.0000000000 0.5511274366  
C 1.1497185402 0.0000000000 1.8950553835  
H 2.1735164154 0.0000000000 2.2369636373  
C -1.1497185402 -0.0000000000 1.8950553835  
H -2.1735164154 -0.0000000000 2.2369636373  
C 0.0000000000 0.0000000000 2.6999190230  
H 0.0000000000 0.0000000000 3.7807540230  
\$end

\$comment  
Isophthalonitrile  
Nuclear Repulsion Energy = 408.25362299 hartrees  
\$end

\$molecule  
O 1  
C 0.0000000000 0.0000000000 -0.7611454554  
C 0.0000000000 0.0000000000 2.0357668855  
H 0.0000000000 0.0000000000 -1.8416384554  
H 0.0000000000 0.0000000000 3.1163608855  
C 1.2036616314 0.0000000000 -0.0532329145  
C -1.2036616314 -0.0000000000 -0.0532329145  
C 1.2077592756 0.0000000000 1.3459900855  
C -1.2077592756 -0.0000000000 1.3459900855  
H 2.1491100458 0.0000000000 1.8765262681  
H -2.1491100458 -0.0000000000 1.8765262681  
C -2.4431040460 -0.0000000000 -0.7688835877  
C 2.4431040460 0.0000000000 -0.7688835877  
N -3.4594892826 -0.0000000000 -1.3544276927  
N 3.4594892826 0.0000000000 -1.3544276927  
\$end

\$comment  
Phthalimide  
Nuclear Repulsion Energy = 555.99908405 hartrees  
\$end

\$molecule  
O 1  
N 0.000000000 0.000000000 2.0040908542  
H 0.000000000 0.000000000 3.0119678542  
C 1.1682524528 0.000000000 1.2386306388  
O 2.3011200960 0.000000000 1.6670025478  
C -1.1682524528 -0.000000000 1.2386306388  
O -2.3011200960 -0.000000000 1.6670025478  
C 0.6962780385 0.000000000 -0.1738809943  
C 1.4225683398 0.000000000 -1.3533552596  
H 2.5035811189 0.000000000 -1.3406024073  
C -0.6962780385 -0.000000000 -0.1738809943  
C -1.4225683398 -0.000000000 -1.3533552596  
H -2.5035811189 -0.000000000 -1.3406024073  
C 0.6998855532 -0.000000000 -2.5485997635  
H 1.2273446728 -0.000000000 -3.4924903968  
C -0.6998855532 0.000000000 -2.5485997635  
H -1.2273446728 0.000000000 -3.4924903968  
\$end

\$comment  
Phthalic Anhydride  
Nuclear Repulsion Energy = 557.95918775 hartrees  
\$end

\$molecule  
O 1  
O 0.000000000 0.000000000 2.0399909960  
C 1.1433631827 0.000000000 1.2374942246  
O 2.2469461705 0.000000000 1.7004541646  
C -1.1433631827 -0.000000000 1.2374942246  
O -2.2469461705 -0.000000000 1.7004541646  
C 0.6932996629 0.000000000 -0.1712514501  
C -0.6932996629 -0.000000000 -0.1712514501  
C 1.4256099915 -0.000000000 -1.3488266847  
H 2.5063094367 -0.000000000 -1.3365653369  
C -1.4256099915 0.000000000 -1.3488266847  
H -2.5063094367 0.000000000 -1.3365653369  
C 0.7008829906 -0.000000000 -2.5409864852  
H 1.2267774977 -0.000000000 -3.4856261389  
C -0.7008829906 0.000000000 -2.5409864852  
H -1.2267774977 0.000000000 -3.4856261389  
\$end

\$comment  
Acridine  
Nuclear Repulsion Energy = 774.34300516 hartrees  
\$end

\$molecule

O 1

|   |               |               |               |
|---|---------------|---------------|---------------|
| N | 0.0000000000  | 0.0000000000  | 1.3879036199  |
| C | -1.1517901135 | 0.0000000000  | 0.6929070436  |
| C | 1.1517901135  | -0.0000000000 | 0.6929070436  |
| C | -2.3720383668 | 0.0000000000  | 1.4210815022  |
| H | -2.3090032869 | 0.0000000000  | 2.5007860171  |
| C | -3.5773593832 | 0.0000000000  | 0.7659198613  |
| H | -4.4988755255 | 0.0000000000  | 1.3320183983  |
| C | -3.6272428692 | 0.0000000000  | -0.6520339617 |
| H | -4.5863609808 | 0.0000000000  | -1.1520693349 |
| C | -2.4723143512 | 0.0000000000  | -1.3920873795 |
| H | -2.5074729570 | 0.0000000000  | -2.4745745637 |
| C | -1.2067024347 | 0.0000000000  | -0.7460405285 |
| C | 0.0000000000  | 0.0000000000  | -1.4456554735 |
| H | 0.0000000000  | 0.0000000000  | -2.5306814735 |
| C | 1.2067024347  | -0.0000000000 | -0.7460405285 |
| C | 2.4723143512  | -0.0000000000 | -1.3920873795 |
| H | 2.5074729570  | -0.0000000000 | -2.4745745637 |
| C | 3.6272428692  | -0.0000000000 | -0.6520339617 |
| H | 4.5863609808  | -0.0000000000 | -1.1520693349 |
| C | 3.5773593832  | -0.0000000000 | 0.7659198613  |
| H | 4.4988755255  | -0.0000000000 | 1.3320183983  |
| C | 2.3720383668  | -0.0000000000 | 1.4210815022  |
| H | 2.3090032869  | -0.0000000000 | 2.5007860171  |

\$end

## 1.2 Dipole-bound radical anions

```
$comment
Uracil
Nuclear Repulsion Energy = 357.68565001 hartrees
$end
```

```
$molecule
0 1
  N   0.0332959514  -0.9844726412  -0.0000000000
  H   0.0408384309  -1.9925844260  -0.0000000000
  C  -1.2142801248  -0.3986739772  -0.0000000000
  O  -2.2485813820  -1.0256366008  -0.0000000000
  N  -1.1732974436   0.9814346613  -0.0000000000
  H  -2.0672060280   1.4383995864  -0.0000000000
  C  -0.0016908524   1.7029578150   0.0000000000
  H  -0.1210696066   2.7762189796   0.0000000000
  C   1.2008283331   1.1078262041   0.0000000000
  H   2.1183176446   1.6709330293   0.0000000000
  C   1.2806948986  -0.3510959060   0.0000000000
  O   2.3005584418  -1.0040866649   0.0000000000
$end
```

```
$comment
Nitrobenzene
Nuclear Repulsion Energy = 412.90658632 hartrees
$end
```

```
$molecule
0 1
  N   1.7144026049   0.0000137940  -0.0000000000
  O   2.2802741567   1.0903202788  -0.0000000000
  O   2.2803868733  -1.0902736184   0.0000000000
  C   0.2431236050   0.0000260044   0.0000000000
  C  -0.4233660621  -1.2178234556   0.0000000000
  H   0.1431406155  -2.1356344152   0.0000000000
  C  -0.4234525589   1.2178406635  -0.0000000000
  H   0.1429923777   2.1356909042  -0.0000000000
  C  -1.8150472244   1.2073775391  -0.0000000000
  H  -2.3542471026   2.1440765841  -0.0000000000
  C  -1.8149612385  -1.2074285069   0.0000000000
  H  -2.3541011991  -2.1441643479   0.0000000000
  C  -2.5115278990  -0.0000495781  -0.0000000000
  H  -3.5925028981  -0.0000945653  -0.0000000000
$end
```



\$comment  
Benzaldehyde  
Nuclear Repulsion Energy = 321.40219102 hartrees  
\$end

\$molecule  
O 1  
C 0.5301108806 0.2094451563 0.0000000000  
C -0.3561025276 1.2878987258 0.0000000000  
H 0.0337637693 2.2985700364 0.0000000000  
C -1.7292609981 1.0596326904 0.0000000000  
H -2.4189625404 1.8921549526 0.0000000000  
C -2.2126128958 -0.2474932818 -0.0000000000  
H -3.2790500662 -0.4271549301 -0.0000000000  
C -1.3251205424 -1.3262390907 -0.0000000000  
H -1.7074112086 -2.3376495336 -0.0000000000  
C 0.0454387787 -1.1012839797 -0.0000000000  
H 0.7548324413 -1.9175156707 -0.0000000000  
C 1.9851692041 0.4694899904 0.0000000000  
H 2.2615603161 1.5403494543 0.0000000000  
O 2.8411919865 -0.3946819466 -0.0000000000  
\$end

\$comment  
Benzonitrile  
Nuclear Repulsion Energy = 300.09121671 hartrees  
\$end

\$molecule  
O 1  
C 0.0000000000 0.0000000000 2.1746561879  
C 1.2072838898 0.0000000000 1.4803615442  
C 1.2122184965 0.0000000000 0.0906046613  
C 0.0000000000 0.0000000000 -0.6023344411  
C -1.2122184965 0.0000000000 0.0906046613  
C -1.2072838898 0.0000000000 1.4803615442  
H 0.0000000000 0.0000000000 3.2560219551  
H 2.1441224787 0.0000000000 2.0195328576  
H 2.1428929996 0.0000000000 -0.4589656243  
H -2.1428929996 0.0000000000 -0.4589656243  
H -2.1441224787 0.0000000000 2.0195328576  
C 0.0000000000 0.0000000000 -2.0438027391  
N 0.0000000000 0.0000000000 -3.1999807046  
\$end

\$comment  
Phenyl isocyanide  
Nuclear Repulsion Energy = 303.79558941 hartrees  
\$end

\$molecule  
O 1  
H -2.1449100000 0.0000000000 -1.9838914815  
C -1.2075000000 0.0000000000 -1.4459614815  
C 0.0000000000 0.0000000000 -2.1422714815  
H 0.0000000000 0.0000000000 -3.2230614815  
C 1.2075000000 -0.0000000000 -1.4459614815  
H 2.1449100000 -0.0000000000 -1.9838914815  
C 1.2153200000 -0.0000000000 -0.0552214815  
H 2.1396200000 -0.0000000000 0.5041385185  
C -0.0000000000 0.0000000000 0.6290385185  
C -1.2153200000 0.0000000000 -0.0552214815  
H -2.1396200000 0.0000000000 0.5041385185  
N -0.0000000000 0.0000000000 2.0132985185  
C 0.0000000000 0.0000000000 3.1971785185  
\$end

\$comment  
Nitrosobenzene  
Nuclear Repulsion Energy = 324.55877006 hartrees  
\$end

\$molecule  
O 1  
C 0.5511596405 0.2248256741 0.0000000000  
C -0.3371075273 1.2975860302 -0.0000000000  
H 0.0642512489 2.3017663857 -0.0000000000  
C -1.7062315417 1.0492877903 -0.0000000000  
H -2.4082372231 1.8711445447 -0.0000000000  
C -2.1690464525 -0.2654631376 -0.0000000000  
H -3.2325260915 -0.4615222621 -0.0000000000  
C 0.1003132488 -1.0957174106 0.0000000000  
H 0.8220183746 -1.8997675501 0.0000000000  
C -1.2672666621 -1.3339796605 0.0000000000  
H -1.6380372156 -2.3496484966 0.0000000000  
N 1.9448731995 0.5932527049 -0.0000000000  
O 2.7184367845 -0.3592471590 0.0000000000  
\$end

\$comment  
Pyridazine  
Nuclear Repulsion Energy = 207.83513538 hartrees  
\$end

\$molecule  
O 1  
N 0.6690250497 -1.2339460170 0.0000000000  
N -0.6690049502 -1.2339568257 0.0000000000  
C -1.3194701179 -0.0638605869 0.0000000000  
H -2.3977746736 -0.1485733507 0.0000000000  
C 1.3194713948 -0.0638393148 -0.0000000000  
H 2.3977773146 -0.1485347139 -0.0000000000  
C 0.6913452653 1.1793857151 -0.0000000000  
H 1.2680210316 2.0930430490 -0.0000000000  
C -0.6913647347 1.1793745696 0.0000000000  
H -1.2680552142 2.0930226167 -0.0000000000  
\$end

\$comment  
Acetonitrile  
Nuclear Repulsion Energy = 58.25693243 hartrees  
\$end

\$molecule  
O 1  
H -1.5538092910 -0.3739915064 0.9504102102  
C -1.1827840058 0.0000134229 -0.0000082024  
H -1.5538509575 -0.6361575946 -0.7990089449  
H -1.5538977557 1.0100410342 -0.1513307442  
C 0.2748714404 0.0000070652 -0.0000050541  
N 1.4441476281 -0.0000021231 0.0000012882  
\$end

\$comment  
Formamide  
Nuclear Repulsion Energy = 71.23527648 hartrees  
\$end

\$molecule  
O 1  
C 0.1594929240 -0.3873840762 0.0000000000  
H 0.1290681453 -1.4873113711 0.0000000000  
O 1.1971833014 0.2444830106 -0.0000000000  
N -1.0832689128 0.1591549883 -0.0000000000  
H -1.9022171056 -0.4171937698 0.0000000000  
H -1.1783926045 1.1588605951 -0.0000000000  
\$end

\$comment  
N,N-dimethylformamide  
Nuclear Repulsion Energy = 181.99836537 hartrees  
\$end

\$molecule  
O 1  
N 0.3626792498 -0.0051665302 -0.0000000000  
C -0.7924569973 0.7001170262 0.0000000000  
H -0.6231062200 1.7886391109 0.0000000000  
O -1.9079221267 0.2007953140 0.0000000000  
C 0.2627078342 -1.4537018388 -0.0000000000  
H 1.2620449459 -1.8774312074 -0.0000000000  
H -0.2769649161 -1.8017725081 -0.8792367504  
H -0.2769649161 -1.8017725081 0.8792367504  
C 1.6420238931 0.6820226180 0.0000000000  
H 2.4357903957 -0.0581022244 0.0000000000  
H 1.7650872981 1.3048078523 -0.8855274780  
H 1.7650872981 1.3048078523 0.8855274780  
\$end

\$comment  
Dimethyl sulfoxide  
Nuclear Repulsion Energy = 181.99836537 hartrees  
\$end

\$molecule  
O 1  
N 0.3626792498 -0.0051665302 -0.0000000000  
C -0.7924569973 0.7001170262 0.0000000000  
H -0.6231062200 1.7886391109 0.0000000000  
O -1.9079221267 0.2007953140 0.0000000000  
C 0.2627078342 -1.4537018388 -0.0000000000  
H 1.2620449459 -1.8774312074 -0.0000000000  
H -0.2769649161 -1.8017725081 -0.8792367504  
H -0.2769649161 -1.8017725081 0.8792367504  
C 1.6420238931 0.6820226180 0.0000000000  
H 2.4357903957 -0.0581022244 0.0000000000  
H 1.7650872981 1.3048078523 0.8855274780  
\$end

\$comment  
Nitromethane  
Nuclear Repulsion Energy = 181.99836537 hartrees  
\$end

\$molecule  
O 1  
N 0.1688872759 0.0000617577 -0.0099356859  
O 0.7268248224 1.0931786401 0.0027999582  
O 0.7277142040 -1.0927624828 0.0027984852  
C -1.3146733445 -0.0004913291 -0.0025716396  
H -1.6515514876 -0.9053007738 -0.4916986564  
H -1.6516846788 0.8969812189 -0.5049640370  
H -1.6272469084 0.0075059674 1.0368547847  
\$end

\$comment  
Methyl isocyanide  
Nuclear Repulsion Energy = 59.94456555 hartrees  
\$end

\$molecule  
O 1  
N 0.3087833820 -0.0003091100 -0.0000295292  
C 1.4878422678 0.0002074444 0.0000201182  
C -1.1114625696 0.0000605312 -0.0000002176  
H -1.4732799273 -1.0184723733 -0.1015408599  
H -1.4732451843 0.5974889211 -0.8312434894  
H -1.4732367514 0.4215393686 0.9328716498  
\$end

\$comment  
Vinylene carbonate  
Nuclear Repulsion Energy = 229.41686270 hartrees  
\$end

\$molecule  
O 1  
O -1.1096046400 -0.0000000000 0.0219174472  
C 0.0000000000 0.0000000000 -0.7822878971  
O 0.0000000000 0.0000000000 -1.9731658971  
O 1.1096046400 0.0000000000 0.0219174472  
C -0.6662880114 -0.0000000000 1.3264693103  
H -1.4026126464 -0.0000000000 2.1053700170  
C 0.6662880114 0.0000000000 1.3264693103  
H 1.4026126464 0.0000000000 2.1053700170  
\$end

\$comment  
Acetone  
Nuclear Repulsion Energy = 119.58538797 hartrees  
\$end

\$molecule  
O 1  
C 0.0000000026 -0.0000000000 0.1837019532  
O 0.0000000000 0.0000000000 1.4010539532  
C -1.2809275915 -0.0000000000 -0.6146872465  
H -2.1343486622 -0.0000000000 0.0553027728  
H -1.3168579545 0.8766331563 -1.2612506963  
H -1.3168579545 -0.8766331563 -1.2612506963  
C 1.2809275915 0.0000000000 -0.6146872465  
H 2.1343486622 0.0000000000 0.0553027728  
H 1.3168579545 0.8766331563 -1.2612506963  
H 1.3168579545 -0.8766331563 -1.2612506963  
\$end

\$comment  
Testosterone  
Nuclear Repulsion Energy = 1841.15656587 hartrees  
\$end

\$molecule  
O 1  
C 0.3151979776 0.3890792254 0.1558941975  
H 0.4436518150 0.2439899000 1.2395279817  
C -0.4265990478 1.7196224485 -0.0364161056  
H 0.1497602077 2.5301279039 0.4102027289  
H -0.5067411144 1.9457975721 -1.1006900650  
C -1.8291243030 1.7101531598 0.5808782757  
H -2.3248073189 2.6642921264 0.3763653413  
H -1.7421753099 1.6140666522 1.6688177743  
C -2.6455490097 0.5419670457 0.0498112993  
C -2.9653209219 0.7264737673 -1.4329863586  
H -2.0643413470 0.8094630089 -2.0376635266  
H -3.5549884803 -0.0999200332 -1.8267380011  
H -3.5526081323 1.6336962072 -1.5702772496  
C -1.8819969419 -0.7524941187 0.3424509965  
H -1.6988411891 -0.7586546912 1.4278843890  
C -0.5173058558 -0.8146751082 -0.3210990408  
H -0.6508590271 -0.7657599109 -1.4078897259  
C 0.2020699168 -2.1130716357 0.0173749338  
H -0.3757391580 -2.9701433307 -0.3332239379  
H 0.2823168918 -2.1983375792 1.1062717297  
C 1.5973841021 -2.1379484032 -0.5985159493

|   |               |               |               |
|---|---------------|---------------|---------------|
| H | 2.1375217168  | -3.0435124234 | -0.3204803177 |
| H | 1.4956623492  | -2.1484917750 | -1.6886987932 |
| C | 2.3960925108  | -0.9335661210 | -0.1989379431 |
| C | 3.6312961809  | -1.0817562131 | 0.3245266470  |
| H | 4.0299933450  | -2.0725798776 | 0.5091489153  |
| C | 4.5383317957  | 0.0384905191  | 0.6057565183  |
| O | 5.6226328874  | -0.1276137491 | 1.1488517251  |
| C | 4.0627787408  | 1.3836877823  | 0.1188396298  |
| H | 4.6035212139  | 2.1603181264  | 0.6569214417  |
| H | 4.3366174798  | 1.4659492513  | -0.9364248323 |
| C | 1.7570011240  | 0.4196531840  | -0.4321698136 |
| C | 2.5556923784  | 1.5141469330  | 0.2926856630  |
| H | 2.2313752561  | 2.4950287895  | -0.0557232396 |
| H | 2.3230824872  | 1.4588538269  | 1.3607468110  |
| C | -2.9073896525 | -1.8558598237 | 0.0516036578  |
| H | -2.6997097944 | -2.7676311484 | 0.6086693008  |
| H | -2.8938715409 | -2.1146658070 | -1.0083623676 |
| C | -3.9411637083 | 0.2418198709  | 0.8158786739  |
| H | -3.7175127098 | 0.3154056766  | 1.8878405856  |
| O | -5.0582655188 | 1.0587055707  | 0.4985259905  |
| H | -4.8973832328 | 1.9305729525  | 0.8732377584  |
| C | -4.2594641743 | -1.2165037817 | 0.4520225511  |
| H | -4.7352441476 | -1.7333072863 | 1.2826364733  |
| H | -4.9695561923 | -1.2123322788 | -0.3738668578 |
| C | 1.7477563102  | 0.6974710902  | -1.9443972182 |
| H | 1.1313882782  | -0.0188649953 | -2.4853804019 |
| H | 1.3681398841  | 1.6971413941  | -2.1530731623 |
| H | 2.7582842875  | 0.6306242515  | -2.3480041642 |

\$end

\$comment

Progesterone

Nuclear Repulsion Energy = 2083.85428949 hartrees

\$end

\$molecule

O 1

|   |               |              |               |
|---|---------------|--------------|---------------|
| C | -0.7797679261 | 0.3189572245 | -0.1038775534 |
| H | -0.8740735065 | 0.2070288510 | -1.1949677612 |
| C | 0.0405559578  | 1.5911521430 | 0.1497173240  |
| H | -0.4659133318 | 2.4498973505 | -0.2913373647 |
| H | 0.0992427734  | 1.7843094249 | 1.2221520936  |
| C | 1.4593825386  | 1.5113393380 | -0.4226706090 |
| H | 2.0152308124  | 2.4189683278 | -0.1830989520 |
| H | 1.4023927828  | 1.4403756044 | -1.5147114188 |
| C | 2.1843433554  | 0.2831366870 | 0.1085368993  |

|   |               |               |               |
|---|---------------|---------------|---------------|
| C | 2.4380862697  | 0.4051764584  | 1.6147484753  |
| H | 2.9961334851  | 1.3161445677  | 1.8195942866  |
| H | 1.5083365867  | 0.4396523178  | 2.1792334083  |
| H | 3.0173321191  | -0.4357134667 | 1.9966817059  |
| C | 3.4802329703  | -0.0900079856 | -0.6210758196 |
| H | 3.2761902323  | -0.0303782314 | -1.6993542570 |
| C | 4.6913364274  | 0.7887883183  | -0.4089357982 |
| O | 4.6254966616  | 1.8807460613  | 0.1316226320  |
| C | 5.9996162376  | 0.2556040590  | -0.9444092485 |
| H | 6.7503067810  | 1.0395370693  | -0.9217872687 |
| H | 5.8748566161  | -0.1210674930 | -1.9593089789 |
| H | 6.3325924059  | -0.5813901450 | -0.3301902574 |
| C | 1.3445657127  | -0.9557415504 | -0.2380548274 |
| H | 1.2021434172  | -0.9241882608 | -1.3287660901 |
| C | -0.0456447377 | -0.9467845379 | 0.3735628692  |
| H | 0.0466073523  | -0.9336205162 | 1.4652087275  |
| C | -0.8318893780 | -2.1883484779 | -0.0257453071 |
| H | -0.3261726198 | -3.0897179424 | 0.3255230964  |
| H | -0.8733696710 | -2.2434047569 | -1.1187657590 |
| C | -2.2498832916 | -2.1362814052 | 0.5345772441  |
| H | -2.8347958420 | -2.9989050995 | 0.2138038398  |
| H | -2.1927366185 | -2.1773468215 | 1.6272795963  |
| C | -2.9529504151 | -0.8738958082 | 0.1347150712  |
| C | -4.1709332662 | -0.9295210319 | -0.4440374128 |
| H | -4.6240619526 | -1.8877033716 | -0.6707678935 |
| C | -4.9907539999 | 0.2540800909  | -0.7340985657 |
| O | -6.0558746581 | 0.1725607833  | -1.3318408548 |
| C | -4.4539877920 | 1.5517420973  | -0.1864869339 |
| H | -4.9227206621 | 2.3768661644  | -0.7197590051 |
| H | -4.7649110708 | 1.6194083660  | 0.8595487445  |
| C | -2.2386147168 | 0.4286838858  | 0.4291734825  |
| C | -2.9355421482 | 1.5906581945  | -0.2956800043 |
| H | -2.5648708770 | 2.5391158848  | 0.0934846392  |
| H | -2.6618144671 | 1.5487882684  | -1.3545421410 |
| C | 2.2787612271  | -2.1307678456 | 0.0645145067  |
| H | 2.0349961032  | -3.0158391872 | -0.5206175940 |
| H | 2.2077462621  | -2.4086415831 | 1.1173345043  |
| C | -2.2711456516 | 0.6689045847  | 1.9474175768  |
| H | -1.7244156284 | -0.0990423325 | 2.4925017121  |
| H | -1.8350635840 | 1.6358227131  | 2.1958795299  |
| H | -3.2989068406 | 0.6595409937  | 2.3109912659  |
| C | 3.6926093581  | -1.5870750860 | -0.2673860222 |
| H | 4.1572286990  | -2.1291501291 | -1.0892191433 |
| H | 4.3552538271  | -1.6845974402 | 0.5926904339  |

\$end



\$comment  
Cortisol  
Nuclear Repulsion Energy = 2633.34219375 hartrees  
\$end

\$molecule

O 1  
O 0.3156478415 -2.0698068978 1.1898150821  
H -0.2777404043 -2.8289344911 1.1604299270  
C 0.3260442414 -1.5031905472 -0.1261591021  
H 0.8407073745 -2.1969660347 -0.7980803395  
C -1.0932453888 -1.3222686617 -0.6782135396  
H -1.0292384747 -1.1566473619 -1.7542593176  
H -1.6481437889 -2.2554820086 -0.5394409558  
C -1.8227711057 -0.1439801562 -0.0506686867  
C -2.1673910296 -0.4003645381 1.4188275627  
H -1.2740236844 -0.6481707080 1.9827967859  
H -2.6252372036 0.4721286071 1.8862855389  
H -2.8607010752 -1.2372724331 1.5128163821  
C -0.9583506330 1.1089666423 -0.2245068858  
H -0.7434638906 1.1816499669 -1.2958898661  
C 0.3873061026 1.0113880761 0.4743728674  
H 0.2413730239 0.8927349828 1.5525315210  
C 1.1917300396 2.2813119205 0.2082484690  
H 0.6970538008 3.1426769662 0.6614245379  
H 1.2086197099 2.4516898345 -0.8736043102  
C 2.6249505022 2.1785524513 0.7189265474  
H 3.2024181222 3.0603006048 0.4387187434  
H 2.6084331525 2.1417757751 1.8126107393  
C 3.3085290651 0.9436263128 0.2150422666  
C 4.5217794421 1.0163552569 -0.3703309746  
H 4.9861556486 1.9792442788 -0.5496451587  
C 5.3270525291 -0.1633135568 -0.7162989085  
O 6.3829705984 -0.0692518888 -1.3284950133  
C 4.7905569085 -1.4749220504 -0.2002946164  
H 5.2566493958 -2.2863431121 -0.7563336195  
H 5.1004099972 -1.5698222567 0.8437827233  
C 2.5870326508 -0.3652842006 0.4577061962  
C 3.2720115593 -1.5042738296 -0.3095986721  
H 2.8869581459 -2.4593623691 0.0498347952  
H 3.0043370354 -1.4213198477 -1.3679256660  
C -1.9013552581 2.2635639011 0.1319549510  
H -1.6402845212 3.1810198594 -0.3914285298  
H -1.8605486894 2.4794093101 1.2008022985  
C 1.1401773536 -0.2001596684 -0.1029474401  
H 1.2819701931 0.0405540674 -1.1678938474

|   |               |               |               |
|---|---------------|---------------|---------------|
| C | 2.6484431604  | -0.6372677575 | 1.9734970887  |
| H | 2.2985777979  | -1.6385996000 | 2.2006544886  |
| H | 2.0332299583  | 0.0640835512  | 2.5342683164  |
| H | 3.6754612680  | -0.5240564962 | 2.3236209778  |
| C | -3.0974104727 | 0.3159837780  | -0.8012197771 |
| O | -2.7411494626 | 0.3746719394  | -2.1858879942 |
| H | -3.5358179483 | 0.5842283500  | -2.6893916160 |
| C | -4.2662004302 | -0.6693335310 | -0.6544116991 |
| O | -4.1904651408 | -1.7619496665 | -1.1912886780 |
| C | -5.5369769259 | -0.2824356846 | 0.0990007944  |
| H | -6.2850487164 | -1.0296007456 | -0.1492289811 |
| H | -5.8865281021 | 0.6985308524  | -0.2375023499 |
| O | -5.3867521861 | -0.3302150786 | 1.5105062943  |
| H | -4.7797244254 | 0.3663834084  | 1.7760140236  |
| C | -3.3097017649 | 1.7510515919  | -0.2712077835 |
| H | -3.9896065240 | 1.7833638422  | 0.5795861993  |
| H | -3.7615236544 | 2.3611814534  | -1.0530629146 |

\$end

### 1.3 Excite dipole-bound states of closed-shell anions

```
$comment
Cyanomethyl anion
Nuclear Repulsion Energy = 52.35839501 hartrees
$end
```

```
$molecule
-1 1
  C -0.1795589102  0.0017252380 -0.0000000000
  N -1.3702124120  0.0127993379 -0.0000000000
  C  1.2152986273 -0.1033284197  0.0000000000
  H  1.6885242909  0.2600118626  0.9078030521
  H  1.6885242909  0.2600118626 -0.9078030521
$end
```

```
$comment
9-Anthroxide
Nuclear Repulsion Energy = 869.94286791 hartrees
$end
```

```
$molecule
-1 1
  O  0.0000000000  0.0000000000  2.5558359048
  C  0.0000000000  0.0000000000  1.2992249048
  C  0.0000000000  0.0000000000 -1.6232905048
  C  1.2114124089  0.0000000000 -0.9210087580
  C -1.2114124089 -0.0000000000 -0.9210087580
  C  1.2287628180  0.0000000000  0.5143780476
  C -1.2287628226 -0.0000000000  0.5143780499
  C  2.4642472785  0.0000000000  1.1949586597
  C -2.4642472785 -0.0000000000  1.1949586597
  C  2.4696442069  0.0000000000 -1.5882299661
  C -2.4696442069 -0.0000000000 -1.5882299661
  C  3.6631268536  0.0000000000  0.5146921362
  C -3.6631268536 -0.0000000000  0.5146921362
  C  3.6615792470  0.0000000000 -0.8999980173
  C -3.6615792470 -0.0000000000 -0.8999980173
  H  0.0000000000  0.0000000000 -2.7080985048
  H  2.4209840238  0.0000000000  2.2769480620
  H -2.4209840253 -0.0000000000  2.2769480664
  H  2.4735165418  0.0000000000 -2.6738730600
  H -2.4735165418 -0.0000000000 -2.6738730600
  H  4.5985990543  0.0000000000 -1.4451401679
  H -4.5985990543 -0.0000000000 -1.4451401679
  H  4.6011091968  0.0000000000  1.0562150609
  H -4.6011091968 -0.0000000000  1.0562150609
$end
```

\$comment  
2-Naphthoxide  
Nuclear Repulsion Energy = 530.42332952 hartrees  
\$end

\$molecule  
-1 1  
O -3.4299176974 -0.6970275445 0.0000000000  
C 0.2326459785 -0.6330027032 -0.0000000000  
C 0.4826882869 0.7850131822 -0.0000000000  
C -0.6460798238 1.6431206839 -0.0000000000  
C -1.0802474995 -1.1227004370 0.0000000000  
C 1.3727091509 -1.4855578130 -0.0000000000  
C 1.8071069360 1.2663222522 -0.0000000000  
C -1.9221392888 1.1387460522 0.0000000000  
C -2.2354796674 -0.2855571954 0.0000000000  
C 2.6599950275 -0.9879982069 -0.0000000000  
C 2.8891880944 0.4051498662 -0.0000000000  
H -0.4822845801 2.7176655355 -0.0000000000  
H 1.2104015764 -2.5587749385 0.0000000000  
H -1.2417731420 -2.1965209288 0.0000000000  
H 1.9642680458 2.3410590280 -0.0000000000  
H -2.7737978598 1.8116817667 0.0000000000  
H 3.5000440089 -1.6733219080 -0.0000000000  
H 3.9001603625 0.7932177137 -0.0000000000  
\$end

\$comment  
Phenoxide  
Nuclear Repulsion Energy = 259.68466743 hartrees  
\$end

\$molecule  
-1 1  
O 0.0000000000 0.0000000000 2.3499026609  
C 0.0000000000 0.0000000000 1.0827496609  
C 0.0000000000 0.0000000000 -1.8285590810  
C 1.1967659112 -0.0000000000 -1.1029502085  
C -1.1967659112 0.0000000000 -1.1029502085  
C 1.2025959940 -0.0000000000 0.2865025602  
C -1.2025959940 0.0000000000 0.2865025602  
H 0.0000000000 0.0000000000 -2.9111380810  
H 2.1441220426 -0.0000000000 0.8263378633  
H -2.1441220426 0.0000000000 0.8263378633  
H 2.1449121067 -0.0000000000 -1.6342660221  
H -2.1449121067 0.0000000000 -1.6342660221  
\$end

## 1.4 Quadrupole-bound anions

```
$comment
Terephthalonitrile
Nuclear Repulsion Energy = 406.56399256 hartrees
$end
```

```
$molecule
0 1
H 1.2422296847 2.1457578212 0.0000000000
H 1.2422296848 -2.1457578212 -0.0000000000
H -1.2422296848 2.1457578211 0.0000000000
H -1.2422296848 -2.1457578212 -0.0000000000
C 0.6935312672 1.2148881997 0.0000000000
C 0.6935312672 -1.2148881997 -0.0000000000
C -0.6935312673 1.2148881996 0.0000000000
C -0.6935312672 -1.2148881997 -0.0000000000
C 1.3898130926 0.0000000000 0.0000000000
C -1.3898130926 -0.0000000001 -0.0000000000
C 2.8195237224 0.0000000000 0.0000000000
C -2.8195237224 0.0000000001 0.0000000000
N 3.9930935740 0.0000000001 0.0000000000
N -3.9930935738 0.0000000000 0.0000000000
$end
```

```
$comment
p-Diisocyanobenzene
Nuclear Repulsion Energy = 415.42632682 hartrees
$end
```

```
$molecule
0 1
H 1.2498365677 2.1414942565 -0.0000000000
H 1.2498365677 -2.1414942567 0.0000000000
H -1.2498365677 2.1414942567 -0.0000000000
H -1.2498365677 -2.1414942567 0.0000000000
C 0.6937576123 1.2155637444 -0.0000000000
C 0.6937576124 -1.2155637446 0.0000000000
C -0.6937576123 1.2155637445 -0.0000000000
C -0.6937576123 -1.2155637446 0.0000000000
C 1.3796157636 -0.0000000000 0.0000000000
C -1.3796157636 -0.0000000000 0.0000000000
N 2.7603928025 0.0000000001 -0.0000000000
N -2.7603928025 0.0000000001 -0.0000000000
C 3.9450306333 0.0000000001 -0.0000000000
C -3.9450306334 0.0000000001 -0.0000000000
$end
```

\$comment  
Succinonitrile  
Nuclear Repulsion Energy = 178.87883005 hartrees  
\$end

\$molecule  
O 1  
C 0.4712426054 -0.6068960308 -0.0000012082  
C -0.4712426054 0.6068960308 0.0000000000  
H 0.2890669612 -1.2235512733 0.8786880203  
H 0.2890669612 -1.2235512733 -0.8786880203  
H -0.2890669612 1.2235512733 0.8786880203  
H -0.2890669612 1.2235512733 -0.8786880203  
C 1.8642109231 -0.1726011128 -0.0000004321  
C -1.8642109231 0.1726011128 0.0000000000  
N 2.9704602178 0.2093874155 0.0000017738  
N -2.9704602178 -0.2093874155 0.0000000000  
\$end

\$comment  
2,6-Dicyanonaphthalene  
Nuclear Repulsion Energy = 709.54831541 hartrees  
\$end

\$molecule  
O 1  
C 0.2205566662 0.6804087650 0.0000000000  
C -0.2205566662 -0.6804087650 0.0000000000  
C 0.7423460633 -1.7180049284 -0.0000000000  
C -0.7423460633 1.7180049284 -0.0000000000  
C 1.6030858003 0.9550288811 0.0000000000  
C -1.6030857986 -0.9550288837 -0.0000000000  
C 2.0857483054 -1.4310483373 -0.0000000000  
C -2.0857483054 1.4310483373 -0.0000000000  
C 2.5196119567 -0.0819472718 -0.0000000000  
C -2.5196119567 0.0819472718 -0.0000000000  
H 0.4062995313 -2.7469465879 -0.0000000000  
H -0.4062995313 2.7469465879 -0.0000000000  
H 1.9479970191 1.9810456666 -0.0000000000  
H -1.9479970191 -1.9810456666 -0.0000000000  
H 2.8214860020 -2.2227753429 -0.0000000000  
H -2.8214860020 2.2227753429 -0.0000000000  
C 3.9200097805 0.2053787857 0.0000000000  
C -3.9200097805 -0.2053787857 0.0000000000  
N 5.0712512565 0.4341409472 0.0000000000  
N -5.0712512565 -0.4341409472 0.0000000000  
\$end

\$comment  
*p*-Dinitrobenzene  
Nuclear Repulsion Energy = 660.96984418 hartrees  
\$end

\$molecule  
O 1  
C 1.3615906780 0.0000000000 -0.0000000000  
C -1.3615906780 -0.0000000000 -0.0000000000  
C 0.6944778617 1.2191745904 -0.0000000000  
C 0.6944778617 -1.2191745903 0.0000000000  
C -0.6944778618 1.2191745904 -0.0000000000  
C -0.6944778617 -1.2191745903 0.0000000000  
H 1.2605803387 2.1371547091 -0.0000000000  
H -1.2605803387 2.1371547091 -0.0000000000  
H 1.2605803387 -2.1371547091 0.0000000000  
H -1.2605803387 -2.1371547090 0.0000000000  
N 2.8321219727 0.0000000000 -0.0000000000  
N -2.8321219727 -0.0000000000 0.0000000000  
O 3.3947244689 1.0920129331 -0.0000000000  
O 3.3947244689 -1.0920129332 0.0000000000  
O -3.3947244689 1.0920129331 -0.0000000000  
O -3.3947244688 -1.0920129332 0.0000000000

\$end

\$comment  
Tetracyanobenzene  
Nuclear Repulsion Energy = 676.34160238 hartrees  
\$end

\$molecule  
O 1  
C 0.0000000000 1.4002263649 0.0000000000  
C 0.0000000485 -1.4002263649 0.0000000000  
H 0.0000000000 2.4810183649 0.0000000000  
H 0.0000001373 -2.4810183649 0.0000000000  
C 1.2091675824 0.7046656395 0.0000000000  
C 1.2091675824 -0.7046656395 -0.0000000000  
C -1.2091675824 0.7046656395 -0.0000000000  
C -1.2091675824 -0.7046656395 0.0000000000  
C 2.4412737175 1.4244734446 -0.0000000000  
C 2.4412737175 -1.4244734446 0.0000000000  
C -2.4412737175 1.4244734446 0.0000000000  
C -2.4412737175 -1.4244734446 -0.0000000000  
N 3.4479648091 2.0293108905 -0.0000000000  
N 3.4479648091 -2.0293108905 0.0000000000  
N -3.4479648091 2.0293108905 0.0000000000  
N -3.4479648091 -2.0293108905 -0.0000000000

\$end

```
$comment
sym-Tetracyanonaphthalene
Nuclear Repulsion Energy = 1020.25046534 hartrees
$end
```

```
$molecule
O 1
C 0.0000000000 0.7153119208 0.0000000000
C 0.0000000000 -0.7153119208 -0.0000000000
C 1.2294867825 1.4056580791 0.0000000000
C 1.2294867825 -1.4056580791 -0.0000000000
C -1.2294867825 1.4056580791 0.0000000000
C -1.2294867825 -1.4056580791 -0.0000000000
H 1.2402503710 2.4878776537 0.0000000000
H 1.2402503710 -2.4878776537 -0.0000000000
H -1.2402503710 2.4878776537 0.0000000000
H -1.2402503710 -2.4878776537 -0.0000000000
C 2.4254112789 0.7126552134 0.0000000000
C 2.4254112789 -0.7126552134 -0.0000000000
C -2.4254112789 0.7126552134 0.0000000000
C -2.4254112789 -0.7126552134 -0.0000000000
C 3.6627422331 1.4244689355 0.0000000000
C 3.6627422331 -1.4244689355 -0.0000000000
C -3.6627422331 1.4244689355 0.0000000000
C -3.6627422331 -1.4244689355 -0.0000000000
N 4.6734053815 2.0224932683 0.0000000000
N 4.6734053815 -2.0224932683 -0.0000000000
N -4.6734053815 2.0224932683 0.0000000000
N -4.6734053815 -2.0224932683 -0.0000000000
$end
```



## 1.5 Correlation-bound anions

```
$comment  
Hexafluorobenzene  
Nuclear Repulsion Energy = 734.40650321 hartrees  
$end
```

```
$molecule  
O 1  
C 1.3697013386 0.2355844032 -0.0000000000  
C -1.3697013386 -0.2355844032 -0.0000000000  
C 0.8888796645 -1.0684122879 -0.0000000000  
C -0.8888796645 1.0684122879 -0.0000000000  
C 0.4808286423 1.3039941574 0.0000000000  
C -0.4808286423 -1.3039941574 0.0000000000  
F 0.9403848257 2.5502759181 0.0000000000  
F -0.9403848257 -2.5502759181 0.0000000000  
F 1.7384186974 -2.0895320529 -0.0000000000  
F -1.7384186974 2.0895320529 -0.0000000000  
F -2.6787934184 -0.4607480456 0.0000000000  
F 2.6787934184 0.4607480456 0.0000000000  
$end
```

```
$comment  
Perfluorocubane  
Nuclear Repulsion Energy = 1284.52287119 hartrees  
$end
```

```
$molecule  
O 1  
C 0.7863625069 0.7863625055 0.7863625027  
C 0.7863625069 0.7863625055 -0.7863625027  
C 0.7863625069 -0.7863625055 0.7863625027  
C 0.7863625069 -0.7863625055 -0.7863625027  
C -0.7863625069 0.7863625055 0.7863625027  
C -0.7863625069 0.7863625055 -0.7863625027  
C -0.7863625069 -0.7863625055 0.7863625027  
C -0.7863625069 -0.7863625055 -0.7863625027  
F 1.5568185472 1.5568185392 1.5568185378  
F 1.5568185472 1.5568185392 -1.5568185378  
F 1.5568185472 -1.5568185392 1.5568185378  
F 1.5568185472 -1.5568185392 -1.5568185378  
F -1.5568185472 1.5568185392 1.5568185378  
F -1.5568185472 1.5568185392 -1.5568185378  
F -1.5568185472 -1.5568185392 1.5568185378  
F -1.5568185472 -1.5568185392 -1.5568185378  
$end
```

\$comment  
Hexachlorobenzene  
Nuclear Repulsion Energy = 1349.91415449 hartrees  
\$end

\$molecule  
O 1  
C 1.4013140976 0.0000000001 0.0000000000  
C -1.4013140976 -0.0000000001 -0.0000000000  
C 0.7006574999 1.2135737551 -0.0000000000  
C 0.7006575001 -1.2135737550 0.0000000000  
C -0.7006574999 -1.2135737551 0.0000000000  
C -0.7006575001 1.2135737550 -0.0000000000  
Cl -3.1139980976 -0.0000000001 0.0000000000  
Cl 3.1139980976 0.0000000001 0.0000000000  
Cl -1.5570060575 -2.6967989764 0.0000000000  
Cl 1.5570060577 -2.6967989763 0.0000000000  
Cl 1.5570060575 2.6967989764 -0.0000000000  
Cl -1.5570060577 2.6967989763 -0.0000000000  
\$end

\$comment  
Octafluoronaphthalene  
Nuclear Repulsion Energy = 1385.99890539 hartrees  
\$end

\$molecule  
O 1  
C 2.4241213154 0.7015895000 0.0000000000  
C 2.4241213154 -0.7015895000 0.0000000000  
C -2.4241213154 -0.7015895000 0.0000000000  
C -2.4241213154 0.7015895000 0.0000000000  
C 1.2385377850 -1.3968651896 0.0000000000  
C 1.2385377850 1.3968651896 0.0000000000  
C -1.2385377850 1.3968651896 -0.0000000000  
C -1.2385377850 -1.3968651896 -0.0000000000  
C 0.0000000000 0.7193030502 0.0000000000  
C 0.0000000000 -0.7193030502 0.0000000000  
F 1.2907397534 2.7265138603 -0.0000000000  
F 1.2907397534 -2.7265138603 -0.0000000000  
F -1.2907397534 2.7265138603 0.0000000000  
F -1.2907397534 -2.7265138603 -0.0000000000  
F 3.5850705108 -1.3442887067 -0.0000000000  
F 3.5850705108 1.3442887067 -0.0000000000  
F -3.5850705108 1.3442887067 0.0000000000  
F -3.5850705108 -1.3442887067 0.0000000000  
\$end

## 2 EOMEA-CCSD Dyson orbitals of valence anions

Terephthalonitrile ( $B_{1u}$  state)

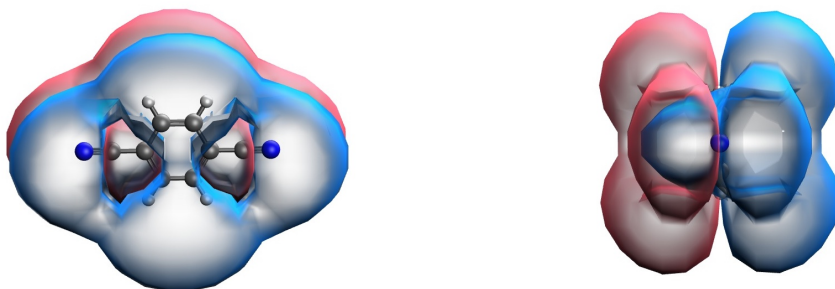

*p*-Diisocyanobenzene ( $B_{1u}$  state)

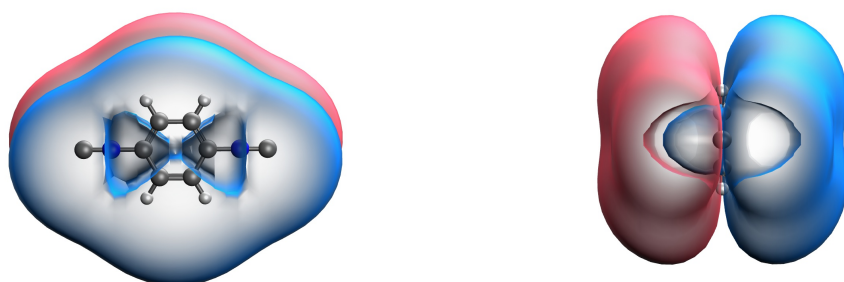

*p*-Dinitrobenzene ( $B_{1u}$  state)

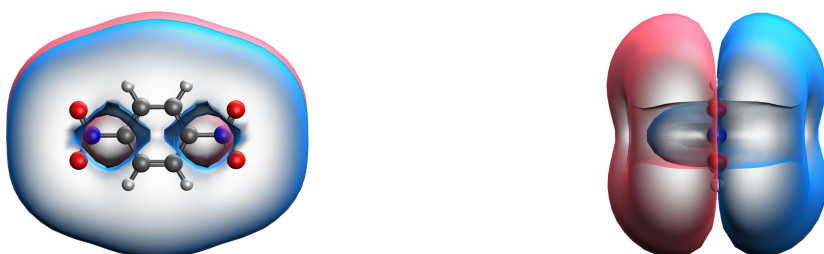

*p*-Dinitrobenzene ( $B_{2g}$  state)

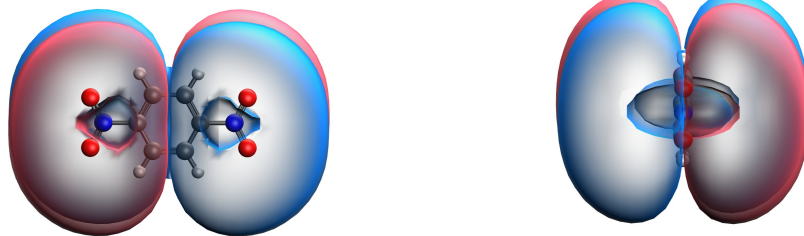

2,6-Dicyanonaphthalene ( $B_g$  state)

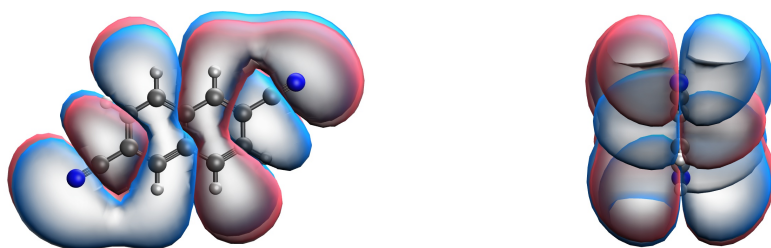

Tetracyanobenzene ( $B_{1u}$  state)

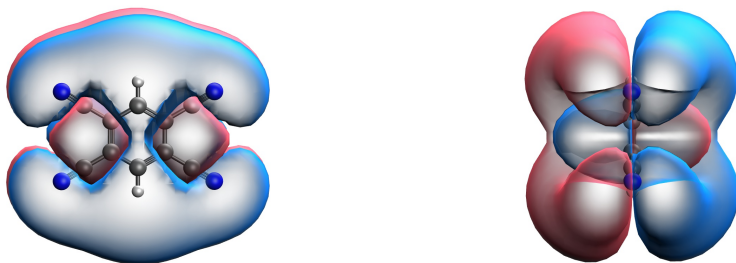

Tetracyanobenzene ( $A_u$  state)

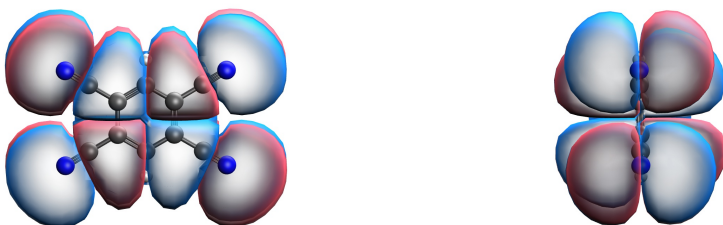

### 3 Basis-set orthogonalization

|                                                    |                                                               | Number of<br>basis functions | Number of<br>orthogonal orbitals | %<br>retained |
|----------------------------------------------------|---------------------------------------------------------------|------------------------------|----------------------------------|---------------|
| Dipole-bound radical anions                        |                                                               |                              |                                  |               |
| Acetonitrile                                       | CH <sub>3</sub> CN                                            | 261                          | 256                              | 98.1          |
| Formamide                                          | CH <sub>3</sub> NO                                            | 261                          | 256                              | 98.1          |
| Methyl isocyanide                                  | CH <sub>3</sub> NC                                            | 261                          | 256                              | 98.1          |
| Nitromethane                                       | CH <sub>3</sub> NO <sub>2</sub>                               | 322                          | 317                              | 98.4          |
| Acetone                                            | (CH <sub>3</sub> ) <sub>2</sub> CO                            | 400                          | 390                              | 97.5          |
| Dimethyl sulfoxide                                 | (CH <sub>3</sub> ) <sub>2</sub> SO                            | 404                          | 397                              | 98.3          |
| Vinylene carbonate                                 | C <sub>3</sub> H <sub>2</sub> O <sub>3</sub>                  | 418                          | 401                              | 95.9          |
| Pyridazine                                         | C <sub>4</sub> H <sub>4</sub> N <sub>2</sub>                  | 470                          | 446                              | 94.9          |
| N,N-Dimethylformamide                              | (CH <sub>3</sub> ) <sub>2</sub> NCHO                          | 487                          | 470                              | 96.5          |
| Uracil                                             | C <sub>4</sub> H <sub>4</sub> N <sub>2</sub> O <sub>2</sub>   | 592                          | 557                              | 94.1          |
| Benzonitrile                                       | C <sub>6</sub> H <sub>5</sub> CN                              | 618                          | 576                              | 93.2          |
| Phenyl isocyanide                                  | C <sub>6</sub> H <sub>5</sub> NC                              | 618                          | 577                              | 93.4          |
| Nitrosobenzene                                     | C <sub>6</sub> H <sub>5</sub> NO                              | 618                          | 579                              | 93.7          |
| Benzaldehyde                                       | C <sub>6</sub> H <sub>5</sub> CHO                             | 644                          | 600                              | 93.2          |
| Nitrobenzene                                       | C <sub>6</sub> H <sub>5</sub> NO <sub>2</sub>                 | 679                          | 634                              | 93.4          |
| Testosterone                                       | C <sub>19</sub> H <sub>28</sub> O <sub>2</sub>                | 2009                         | 1762                             | 87.7          |
| Progesterone                                       | C <sub>21</sub> H <sub>30</sub> O <sub>2</sub>                | 2183                         | 1908                             | 87.4          |
| Cortisol                                           | C <sub>21</sub> H <sub>30</sub> O <sub>5</sub>                | 2366                         | 2058                             | 87.0          |
| Excited dipole-bound states of closed shell anions |                                                               |                              |                                  |               |
| Cyanomethyl anion                                  | CH <sub>2</sub> CN <sup>-</sup>                               | 235                          | 231                              | 98.3          |
| Phenoxide                                          | C <sub>6</sub> H <sub>5</sub> O <sup>-</sup>                  | 557                          | 524                              | 94.1          |
| 2-Naphthoxide                                      | C <sub>10</sub> H <sub>7</sub> O <sup>-</sup>                 | 853                          | 775                              | 90.9          |
| 9-Anthroxide                                       | C <sub>14</sub> H <sub>9</sub> O <sup>-</sup>                 | 1149                         | 1020                             | 88.8          |
| Quadrupole-bound anions                            |                                                               |                              |                                  |               |
| Succinonitrile                                     | C <sub>4</sub> H <sub>4</sub> N <sub>2</sub>                  | 470                          | 452                              | 96.2          |
| Terephthalonitrile                                 | C <sub>6</sub> H <sub>4</sub> (CN) <sub>2</sub>               | 714                          | 658                              | 92.2          |
| <i>p</i> -Diisocyanobenzene                        | C <sub>6</sub> H <sub>4</sub> (NC) <sub>2</sub>               | 714                          | 660                              | 92.4          |
| <i>p</i> -Dinitrobenzene                           | C <sub>6</sub> H <sub>4</sub> (NO <sub>2</sub> ) <sub>2</sub> | 836                          | 774                              | 92.6          |
| Tetracyanobenzene                                  | C <sub>6</sub> H <sub>2</sub> (CN) <sub>4</sub>               | 906                          | 820                              | 90.5          |
| 2,6-Dicyanonaphthalene                             | C <sub>10</sub> H <sub>6</sub> (CN) <sub>2</sub>              | 1010                         | 907                              | 89.8          |
| sym-Tetracyanonaphthalene                          | C <sub>10</sub> H <sub>4</sub> (CN) <sub>4</sub>              | 1202                         | 1068                             | 88.9          |
| Correlation-bound anions                           |                                                               |                              |                                  |               |
| Hexafluorobenzene                                  | C <sub>6</sub> F <sub>6</sub>                                 | 888                          | 738                              | 83.1          |
| Hexachlorobenzene                                  | C <sub>6</sub> Cl <sub>6</sub>                                | 912                          | 769                              | 84.3          |
| Octafluorocubane                                   | C <sub>8</sub> F <sub>8</sub>                                 | 1184                         | 947                              | 80.0          |
| Octafluoronaphthalene                              | C <sub>10</sub> F <sub>8</sub>                                | 1332                         | 1058                             | 79.4          |
